# Supplementary material
Source: Springer Nature journal article supplement (https://www.springermedizin.de/resource/supplementary/12913_2013_3161_MOESM3_ESM.pdf/9532562)

**Figure1**

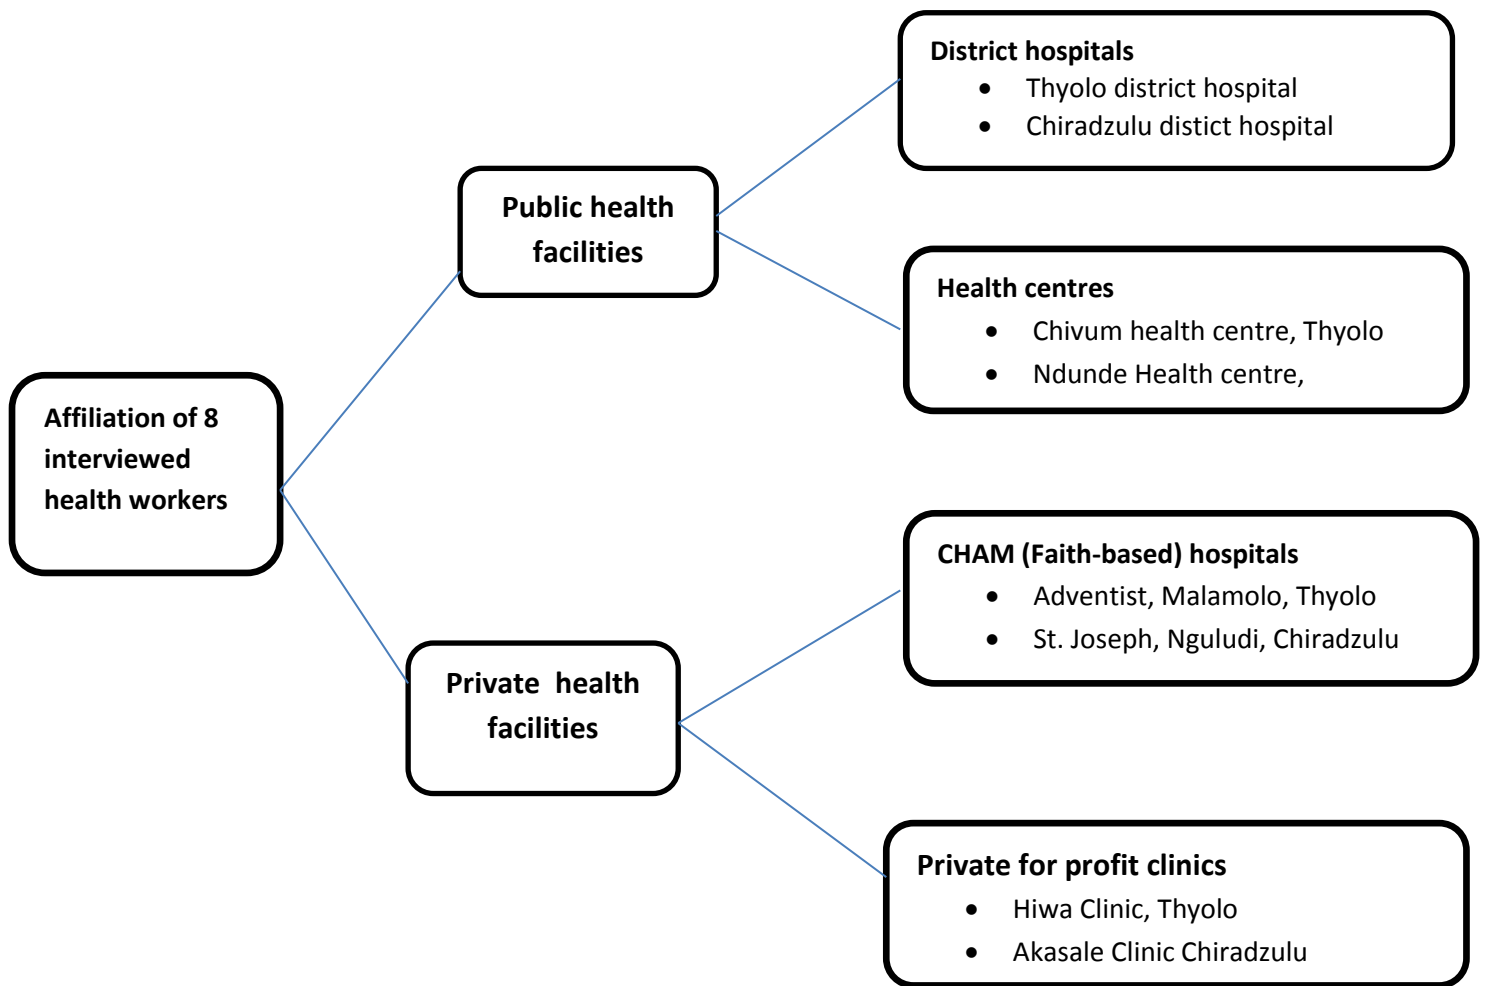

Supplement: MOESM3 [file 9532562]
